# Supplementary material for: Enhanced charge transport from Pd-doping in CsPbBr3 quantum dots for efficient photoelectrocatalytic water splitting
Source: Royal Society of Chemistry journal article supplement (doi:10.1039/d3tc00115f), 2023-01-01
Supplement: d3tc00115f1.pdf [file d3tc00115f1.pdf]

## Supporting Information

### **Enhanced charge transport from Pd-doping in CsPbBr<sub>3</sub> quantum dots for efficient photoelectrocatalytic water splitting**

Wenxiao Gong,<sup>a</sup> Yulan Li,<sup>\*a</sup> Yang Yang,<sup>a</sup> Heng Guo,<sup>\*b</sup> Xiaobin Niu<sup>\*a</sup>

<sup>a</sup> *School of Materials and Energy, University of Electronic Science and Technology of China, Chengdu 610054, P. R. China.*

<sup>b</sup> *School of New Energy and Materials, Southwest Petroleum University, Chengdu, 610050, China.*

\*E-mail address: [heng.guo@swpu.edu.cn](mailto:heng.guo@swpu.edu.cn); [liy103@uestc.edu.cn](mailto:liy103@uestc.edu.cn); [xbniu@uestc.edu.cn](mailto:xbniu@uestc.edu.cn);

[PLEASE NOTE: this document contains an updated Table S2; it replaced the original version on 17th September 2024]

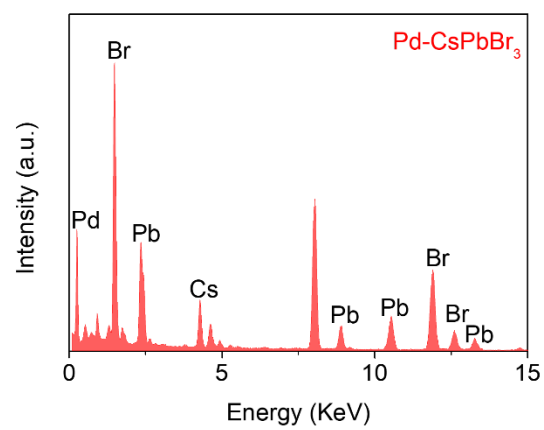

**Figure S1** EDS of Pd-CsPbBr<sub>3</sub> QDs

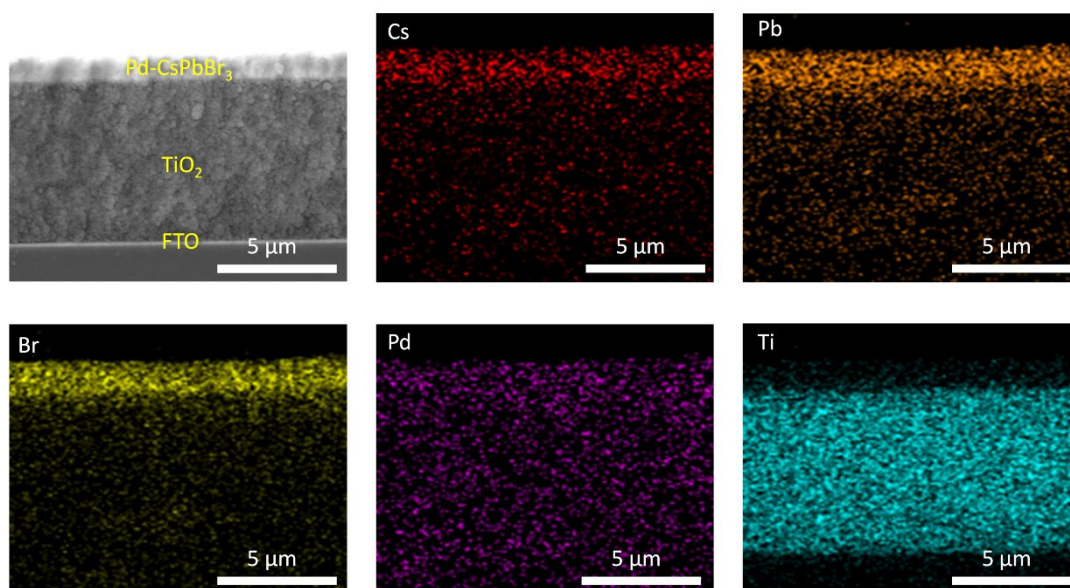

**Figure S2.** The cross-sectional SEM and EDS images of Pd-CsPbBr<sub>3</sub> QDs based device.

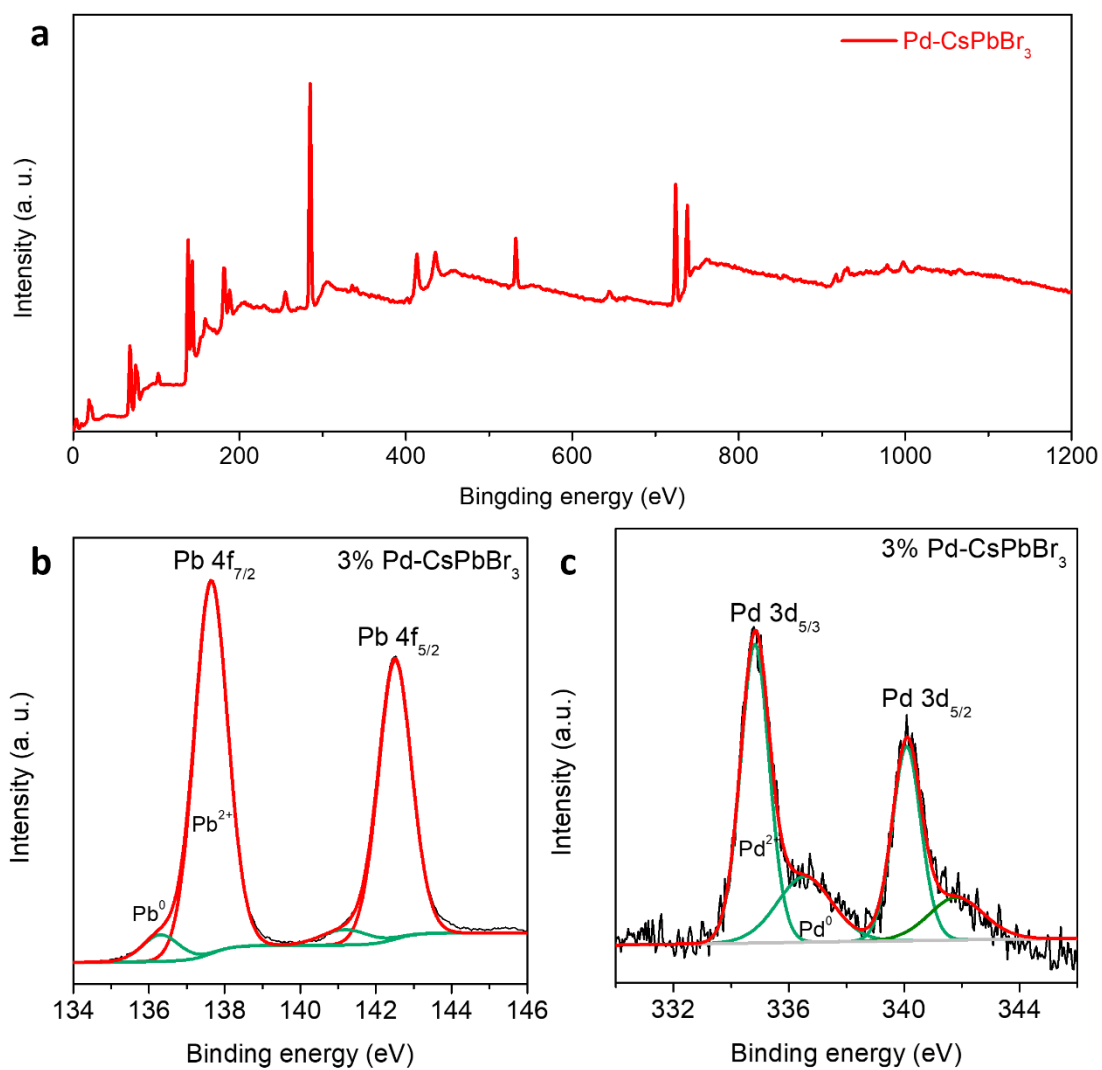

**Figure S3.** (a) The survey XPS spectrum of Pd-CsPbBr<sub>3</sub> QDs. The XPS (b) Pb 4f and Pd 3d spectrum of 3% Pd-CsPbBr<sub>3</sub> QDs.

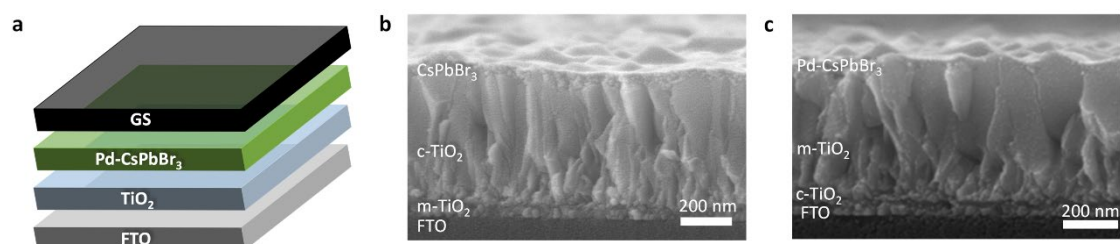

**Figure S4.** (a) The schematic of Pd-CsPbBr<sub>3</sub> QDs based device layer by layer. The cross-sectional EDS of the (b) CsPbBr<sub>3</sub> and (c) Pd-CsPbBr<sub>3</sub> QDs.

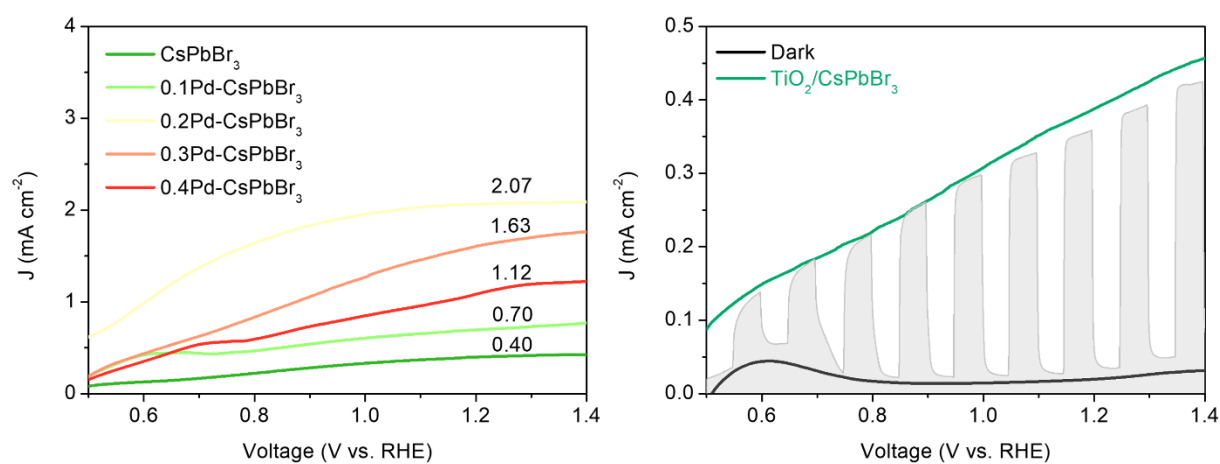

**Figure S5.** LSV of the Pd-CsPbBr<sub>3</sub> QDs based photoanode with different concentrations of Pd doping. The chopped plot of the CsPbBr<sub>3</sub> QDs based device.

**Table S1.** The cross-sectional element EDS mapping of Pd-CsPbBr<sub>3</sub> QDs based device.

| Element | Weight percentage | Wt % Sigma |
|---------|-------------------|------------|
| O       | 38.55             | 0.43       |
| Ti      | 36.95             | 0.35       |
| Pb      | 4.59              | 0.32       |
| Br      | 12.89             | 0.20       |
| Pd      | 2.60              | 0.22       |
| Cs      | 4.42              | 0.35       |

**Table S2.** The Pd/Pb ratio versus dopant concentration of Pd-CsPbBr<sub>3</sub> QDs determined by ICP-OES.

| Element | Pd   | Cs    | Pb    | Br   |
|---------|------|-------|-------|------|
| W (%)   | 0.09 | 19.02 | 33.03 | 8.40 |

**Table S3.** High-resolution XPS peak positions of Cs, Br and Pb elements in CsPbBr<sub>3</sub> and Pd-CsPbBr<sub>3</sub> QDs.

| Sample                 | Cs (eV)           |                   | Br (eV)           |                   | Pb (eV)           |                   |
|------------------------|-------------------|-------------------|-------------------|-------------------|-------------------|-------------------|
|                        | Cs                | Cs                | Br                | Br                | Pb                | Pb                |
|                        | 3d <sub>5/3</sub> | 3d <sub>3/2</sub> | 3d <sub>5/3</sub> | 3d <sub>3/2</sub> | 4f <sub>7/2</sub> | 4f <sub>5/2</sub> |
| CsPbBr <sub>3</sub>    | 722.0             | 735.9             | 66.2              | 67.3              | 136.4             | 141.3             |
| Pd-CsPbBr <sub>3</sub> | 722.0             | 735.9             | 66.2              | 67.3              | 136.6             | 141.5             |

**Table S4.** The corresponding band energy parameters of Pd-CsPbBr<sub>3</sub> and Pd-CsPbBr<sub>3</sub> QDs.

| Sample                 | E <sub>GB</sub> (eV) | E <sub>F</sub> (eV) | E <sub>VB</sub> (eV) | E <sub>CB</sub> (eV) |
|------------------------|----------------------|---------------------|----------------------|----------------------|
| CsPbBr <sub>3</sub>    | 2.35                 | -3.95               | -5.95                | -3.6                 |
| Pd-CsPbBr <sub>3</sub> | 2.30                 | -4.02               | -5.79                | -3.49                |

**Table S5.** Fitted parameters of TRPL decay curves in perovskite films with using Pd-CsPbBr<sub>3</sub> and Pd-CsPbBr<sub>3</sub> QDs.

| ETLs                   | A <sub>1</sub> | τ <sub>1</sub><br>[ns] | A <sub>2</sub> | τ <sub>2</sub><br>[ns] | τ<br>[ns] |
|------------------------|----------------|------------------------|----------------|------------------------|-----------|
| CsPbBr <sub>3</sub>    | 486.90         | 5.26                   | 1304.30        | 0.91                   | 3.87      |
| Pd-CsPbBr <sub>3</sub> | 899.99         | 2.28                   | 396.35         | 13.38                  | 10.28     |

The TRPL decay was fitted by a bi-exponential decay function with below equation:

$$PL_{intensity} = A_1 e^{\frac{-t}{\tau_1}} + A_2 e^{\frac{-t}{\tau_2}}$$

where  $A_1$  and  $A_2$  are time-independent coefficients of amplitude fraction for each decay component,  $\tau_1$  and  $\tau_2$  are decay time of a fast and slow component, respectively.
